# Supplementary material for: Quantifying and understanding the steric properties of N-heterocyclic carbenes
Source: Royal Society of Chemistry journal article supplement (doi:10.1039/c7cc00255f), 2017-01-01
Supplement: c7cc00255f1.pdf [file c7cc00255f1.pdf]

# Quantifying and understanding the steric properties of *N*-heterocyclic carbenes

Adrián Gómez-Suárez,<sup>a</sup> David J. Nelson,<sup>b</sup> and Steven P. Nolan<sup>c</sup>

<sup>a</sup>*Organic Chemistry Institute, WWU Münster, Corrensstrasse 40, 48149 Münster, Germany.*

<sup>b</sup>*WestCHEM Department of Pure and Applied Chemistry, University of Strathclyde, Thomas Graham Building, 295 Cathedral Street, Glasgow, G1 1XL, UK.*

<sup>c</sup>*Department of Inorganic and Physical Chemistry, Ghent University, Krijgslaan 281 – S3, 9000 Gent, Belgium.*

**Table S1.** Buried volumes calculated for IMes-containing complexes from the CCDC; each reference is listed, plus the buried volume (% $V_{bur}$ ) determined at metal-carbon bond lengths of 2.00 and 2.28 Å.<sup>a</sup>

| REFERENCE           |            | 2.00<br>Å | 2.28<br>Å |             | 2.00<br>Å | 2.28<br>Å |            | 2.00<br>Å | 2.28<br>Å |             | 2.00<br>Å | 2.28<br>Å | ERROR<br>(2.00<br>Å) | ERROR<br>(2.28<br>Å) |
|---------------------|------------|-----------|-----------|-------------|-----------|-----------|------------|-----------|-----------|-------------|-----------|-----------|----------------------|----------------------|
| BIGYEV              | <b>IN1</b> | 34.4      | 29.82     | <b>IN2</b>  | 34.0      | 28.8      |            |           |           |             |           |           | 0.4                  | 0.4                  |
| BOGQOF              | <b>Ni1</b> | 33.6      | 28.6      | <b>Ni2</b>  | 33.7      | 28.7      |            |           |           |             |           |           | 0.1                  | 0.1                  |
| CAJFOK              | <b>W1</b>  | 33.6      | 28.5      | <b>W2</b>   | 32.2      | 27.2      |            |           |           |             |           |           | 1.4                  | 1.3                  |
| COMVOK              | <b>IR1</b> | 32.1      | 27.2      | <b>IR2</b>  | 32.4      | 27.5      |            |           |           |             |           |           | 0.3                  | 0.3                  |
| COMVUX              | <b>IR1</b> | 31.6      | 26.8      | <b>IR2</b>  | 31.8      | 26.9      |            |           |           |             |           |           | 0.2                  | 0.1                  |
| DEJAE               | <b>FE1</b> | 31.1      | 26.2      | <b>FE2</b>  | 31.1      | 26.1      | <b>FE3</b> | 31.2      | 26.2      | <b>FE4</b>  | 31.3      | 26.4      | 0.2                  | 0.3                  |
| EFUXAF              | <b>Pd1</b> | 34.5      | 29.6      | <b>Pd2</b>  | 34.8      | 29.9      |            |           |           |             |           |           | 0.3                  | 0.3                  |
| HOVTOC              | <b>SN1</b> | 34.4      | 29.2      | <b>SN2</b>  | 34.0      | 28.9      |            |           |           |             |           |           | 0.4                  | 0.3                  |
| JUPVAT              | <b>GA1</b> | 35.3      | 30.0      | <b>GA2</b>  | 34.3      | 29.1      |            |           |           |             |           |           | 1.0                  | 0.9                  |
| LOMPUZ              | <b>FE1</b> | 31.2      | 26.3      | <b>FE2</b>  | 31.9      | 27.0      |            |           |           |             |           |           | 0.7                  | 0.7                  |
| LUFWIS              | <b>IN1</b> | 34.2      | 29.0      | <b>IN2</b>  | 34.1      | 28.9      |            |           |           |             |           |           | 0.1                  | 0.1                  |
| MAJBAC              | <b>Pt1</b> | 34.1      | 29.1      | <b>Pt2</b>  | 34.1      | 29.0      |            |           |           |             |           |           | 0.0                  | 0.1                  |
| MIVGEF              | <b>Fe1</b> | 33.1      | 28.0      | <b>Fe2</b>  | 33.5      | 28.3      |            |           |           |             |           |           | 0.4                  | 0.3                  |
| NAPQOM              | <b>Ni1</b> | 34.6      | 29.4      | <b>Ni2</b>  | 33.9      | 28.9      |            |           |           |             |           |           | 0.7                  | 0.5                  |
| NEHBAE <sup>b</sup> | <b>Ag1</b> | 34.8      | 29.7      | <b>Ag1'</b> | 35.5      | 30.4      | <b>Ag2</b> | 35.5      | 30.4      | <b>Ag2'</b> | 35.9      | 30.8      |                      |                      |
|                     | <b>Ag3</b> | 35.8      | 30.7      | <b>Ag3'</b> | 35.6      | 30.4      |            |           |           |             |           |           | 1.1                  | 1.1                  |
| NEHBOS              | <b>RH1</b> | 33.4      | 28.3      | <b>RH2</b>  | 32.9      | 27.9      |            |           |           |             |           |           | 0.5                  | 0.4                  |
| NISJIJ              | <b>Os1</b> | 31.0      | 26.0      | <b>Os2</b>  | 33.4      | 28.3      |            |           |           |             |           |           | 2.4                  | 2.3                  |
| OLUQIW01            | <b>Au1</b> | 35.0      | 29.8      | <b>Au2</b>  | 34.7      | 29.5      |            |           |           |             |           |           | 0.3                  | 0.3                  |
| PUNLEQ <sup>b</sup> | <b>Ru1</b> | 32.0      | 27.0      | <b>Ru1'</b> | 31.9      | 26.8      | <b>Ru2</b> | 32.2      | 27.1      | <b>Ru2'</b> | 31.5      | 26.4      | 0.7                  | 0.7                  |
| QIWPEP              | <b>IR1</b> | 32.9      | 27.9      | <b>IR2</b>  | 33.1      | 28.1      |            |           |           |             |           |           | 0.2                  | 0.2                  |
| REHXIM              | <b>Pd1</b> | 34.3      | 29.2      | <b>Pd2</b>  | 34.1      | 29.0      |            |           |           |             |           |           | 0.2                  | 0.2                  |
| RINHOL              | <b>Tl1</b> | 34.7      | 29.4      | <b>Tl2</b>  | 34.4      | 29.2      |            |           |           |             |           |           | 0.3                  | 0.2                  |
| SONGEJ              | <b>Pt1</b> | 35.1      | 29.8      | <b>Pt2</b>  | 34.5      | 29.3      |            |           |           |             |           |           | 0.6                  | 0.5                  |
| SONGUZ              | <b>Pt1</b> | 35.9      | 30.8      | <b>Pt2</b>  | 36.5      | 31.4      |            |           |           |             |           |           | 0.6                  | 0.6                  |
| TUCRUF              | <b>Pd1</b> | 33.9      | 28.7      | <b>Pd2</b>  | 34.7      | 29.6      |            |           |           |             |           |           | 0.8                  | 0.9                  |
| TUTSIK <sup>b</sup> | <b>Ru1</b> | 31.4      | 26.4      | <b>Ru1'</b> | 32.1      | 27.1      | <b>Ru2</b> | 31.7      | 26.7      | <b>Ru2'</b> | 31.4      | 26.4      | 0.7                  | 0.7                  |
| WEZDIQ              | <b>Mn1</b> | 31.9      | 26.9      | <b>Mn2</b>  | 31.7      | 26.7      | <b>Mn3</b> | 32.0      | 27.0      | <b>Mn4</b>  | 31.6      | 26.7      | 0.4                  | 0.3                  |

<sup>a</sup>) Criteria for inclusion:  $R < 0.05$  and  $Z' \geq 2$ . <sup>b</sup>) Contains multiple structures, each with two NHCs in the same environment. Due to symmetry, these are treated as multiple measures of the conformation (and steric impact) of the IMes ligand.

Table 1. Buried volumes calculated for IPr-containing complexes from the CCDC; each reference is listed, plus the buried volume (%Vbur) determined at metal-carbon bond lengths of 2.00 and 2.28 Å.<sup>a</sup>

| REFERENCE           |             | 2.00<br>Å | 2.28<br>Å |             | 2.00<br>Å | 2.28<br>Å |            | 2.00<br>Å | 2.28<br>Å |             | 2.00<br>Å | 2.28<br>Å | ERROR<br>(2.00<br>Å) | ERROR<br>(2.28<br>Å) |
|---------------------|-------------|-----------|-----------|-------------|-----------|-----------|------------|-----------|-----------|-------------|-----------|-----------|----------------------|----------------------|
| ASICUB              | <b>Au1</b>  | 47.7      | 42.1      | <b>Au2</b>  | 45.4      | 39.8      |            |           |           |             |           |           | 2.3                  | 2.3                  |
| BAQSOC              | <b>Pd1</b>  | 32.4      | 27.3      | <b>Pd2</b>  | 32.2      | 27.2      |            |           |           |             |           |           | 0.2                  | 0.1                  |
| BEHXET              | <b>Ge1</b>  | 35.8      | 30.6      | <b>Ge2</b>  | 36.6      | 31.3      |            |           |           |             |           |           | 0.8                  | 0.7                  |
| CESZUX01            | <b>Fe1</b>  | 37.3      | 31.8      | <b>Fe2</b>  | 37.8      | 32.4      |            |           |           |             |           |           | 0.5                  | 0.6                  |
| CODGUZ              | <b>Cu1</b>  | 44.5      | 39.0      | <b>Cu2</b>  | 46.2      | 40.5      |            |           |           |             |           |           | 1.7                  | 1.5                  |
| DIMWIH              | <b>Pd1</b>  | 34.2      | 29.1      | <b>Pd2</b>  | 37.8      | 32.9      |            |           |           |             |           |           | 3.6                  | 2.8                  |
| DOZHAC              | <b>Au1</b>  | 44.6      | 38.9      | <b>Au2</b>  | 45.3      | 39.7      |            |           |           |             |           |           | 0.7                  | 0.8                  |
| EFUNOK              | <b>Au1</b>  | 43.9      | 38.4      | <b>Au2</b>  | 46.3      | 40.7      |            |           |           |             |           |           | 2.4                  | 2.3                  |
| FUPKUY              | <b>Au1</b>  | 33.5      | 28.4      | <b>Au2</b>  | 37.3      | 32.3      |            |           |           |             |           |           | 3.8                  | 3.9                  |
| GILKIX              | <b>Au1</b>  | 37.0      | 32.0      | <b>Au2</b>  | 36.3      | 31.3      |            |           |           |             |           |           | 0.7                  | 0.7                  |
| GUVQIZ              | <b>Rh1</b>  | 38.0      | 33.3      | <b>Rh2</b>  | 36.5      | 31.6      |            |           |           |             |           |           | 1.5                  | 1.7                  |
| HOBPAR              | <b>Cu1</b>  | 46.9      | 41.3      | <b>Cu2</b>  | 46.8      | 41.2      |            |           |           |             |           |           | 0.1                  | 0.1                  |
| HOXZOK              | <b>Pt1</b>  | 39.5      | 34.1      | <b>Pt2</b>  | 42.8      | 37.3      |            |           |           |             |           |           | 3.3                  | 3.2                  |
| INOXEP              | <b>Au1</b>  | 45.3      | 39.7      | <b>Au2</b>  | 42.8      | 37.4      |            |           |           |             |           |           | 2.5                  | 2.3                  |
| JOLFIB <sup>b</sup> | <b>Ni1</b>  | 34.6      | 29.6      | <b>Ni1'</b> | 36.0      | 30.9      | <b>Ni2</b> | 33.9      | 28.8      | <b>Ni2'</b> | 34.5      | 29.4      | 2.1                  | 2.1                  |
| KOKZAN              | <b>Zn1</b>  | 37.7      | 32.2      | <b>Zn2</b>  | 39.3      | 33.8      |            |           |           |             |           |           | 1.6                  | 1.6                  |
| KOTYUP              | <b>Au1</b>  | 44.6      | 39.0      | <b>Au2</b>  | 45.6      | 40.1      |            |           |           |             |           |           | 1.0                  | 1.1                  |
| MADYUN              | <b>Ir1</b>  | 34.4      | 29.6      | <b>Ir2</b>  | 34.0      | 29.0      |            |           |           |             |           |           | 0.4                  | 0.6                  |
| NEZCIG              | <b>Pd1</b>  | 40.5      | 35.1      | <b>Pd2</b>  | 38.2      | 32.8      |            |           |           |             |           |           | 2.3                  | 2.3                  |
| NICWIG              | <b>Au1</b>  | 34.2      | 29.1      | <b>Au2</b>  | 34.3      | 29.1      |            |           |           |             |           |           | 0.1                  | 0.0                  |
| NIPLUV              | <b>Sn1</b>  | 35.5      | 30.3      | <b>Sn2</b>  | 34.6      | 29.4      | <b>Sn3</b> | 35.0      | 29.8      |             |           |           | 0.9                  | 0.5                  |
| OZIBOP              | <b>Au1</b>  | 44.6      | 39.1      | <b>Au2</b>  | 43.6      | 38.1      |            |           |           |             |           |           | 1.0                  | 1.0                  |
| PIKLOL              | <b>Ga1</b>  | 37.0      | 31.6      | <b>Ga2</b>  | 37.5      | 32.0      |            |           |           |             |           |           | 0.5                  | 0.4                  |
| PIYNOC              | <b>Au1</b>  | 42.5      | 37.0      | <b>Au2</b>  | 41.2      | 35.8      | <b>Au3</b> | 41.2      | 35.8      | <b>Au4</b>  | 42.6      | 37.2      | 1.4                  | 1.4                  |
| PIYVIE <sup>b</sup> | <b>Ni1</b>  | 33.7      | 28.6      | <b>Ni2</b>  | 34.6      | 29.6      | <b>Ni3</b> | 35.5      | 30.4      | <b>Ni4</b>  | 34.4      | 29.2      | 1.8                  | 1.8                  |
| POJPAG              | <b>Pd1</b>  | 46.4      | 41.0      | <b>Pd2</b>  | 47.7      | 42.2      |            |           |           |             |           |           | 1.3                  | 1.2                  |
| POJPIO              | <b>Pd1</b>  | 36.3      | 31.1      | <b>Pd2</b>  | 37.2      | 32.2      |            |           |           |             |           |           | 0.9                  | 1.1                  |
| QIGBOZ              | <b>Cu1</b>  | 39.6      | 34.6      | <b>Cu2</b>  | 40.4      | 35.5      |            |           |           |             |           |           | 0.8                  | 0.9                  |
| QIWMAL              | <b>Ir1</b>  | 36.0      | 31.1      | <b>Ir2</b>  | 33.9      | 28.9      |            |           |           |             |           |           | 2.1                  | 2.2                  |
| QOCRUX              | <b>Ni1</b>  | 35.0      | 29.7      | <b>Ni2</b>  | 35.9      | 30.6      |            |           |           |             |           |           | 0.9                  | 0.9                  |
| QOSHUC              | <b>Pd1</b>  | 37.8      | 32.9      | <b>Pd2</b>  | 39.7      | 34.9      |            |           |           |             |           |           | 1.9                  | 2.0                  |
| SICKIA              | <b>Au1</b>  | 42.2      | 36.9      | <b>Au2</b>  | 41.9      | 36.4      |            |           |           |             |           |           | 0.3                  | 0.5                  |
| SOCFAT              | <b>Au1</b>  | 42.7      | 37.1      | <b>Au2</b>  | 45.0      | 39.4      |            |           |           |             |           |           | 2.3                  | 2.3                  |
| SOPZUU <sup>b</sup> | <b>Pd1</b>  | 36.7      | 31.9      | <b>Pd2</b>  | 33.1      | 27.9      | <b>Pd3</b> | 34.6      | 29.7      | <b>Pd4</b>  | 33.6      | 28.6      | 3.6                  | 4.0                  |
| SOQPUL              | <b>Ir1</b>  | 36.5      | 31.4      | <b>Ir2</b>  | 35.0      | 29.9      |            |           |           |             |           |           | 1.5                  | 1.5                  |
| TEGZOV              | <b>Pd1</b>  | 36.7      | 31.5      | <b>Pd2</b>  | 35.8      | 30.6      |            |           |           |             |           |           | 0.9                  | 0.9                  |
| UBIFES              | <b>Rh1</b>  | 35.7      | 31.0      | <b>Rh2</b>  | 36.2      | 31.6      |            |           |           |             |           |           | 0.5                  | 0.6                  |
| VEBJUJ              | <b>Co1</b>  | 34.6      | 29.3      | <b>Co2</b>  | 37.0      | 31.8      |            |           |           |             |           |           | 2.4                  | 2.5                  |
| VUCRUI              | <b>Pd1</b>  | 36.0      | 30.8      | <b>Pd2</b>  | 38.5      | 33.4      | <b>Pd3</b> | 36.1      | 30.9      |             |           |           | 2.5                  | 2.6                  |
| XONMET              | <b>Ni1</b>  | 40.7      | 35.2      | <b>Ni2</b>  | 41.2      | 35.6      |            |           |           |             |           |           | 0.5                  | 0.4                  |
| YOWXUF              | <b>Os1</b>  | 31.2      | 26.5      | <b>Os2</b>  | 31.4      | 26.7      |            |           |           |             |           |           | 0.2                  | 0.2                  |
| YUGTEA              | <b>Ge1</b>  | 37.8      | 32.4      | <b>Ge2</b>  | 38.1      | 32.6      |            |           |           |             |           |           | 0.3                  | 0.2                  |
| ZEXMUM <sup>c</sup> | <b>Au1</b>  | 40.9      | 35.4      | <b>Au2</b>  | 41.3      | 35.8      |            |           |           |             |           |           | 0.4                  | 0.4                  |
|                     | <b>Au1'</b> | 39.9      | 34.4      | <b>Au2'</b> | 41.1      | 35.7      |            |           |           |             |           |           | 1.2                  | 1.3                  |
| ZIHPAJ              | <b>Au1</b>  | 36.4      | 31.5      | <b>Au2</b>  | 37.6      | 32.7      |            |           |           |             |           |           | 1.2                  | 1.2                  |
| ZUWGII              | <b>Co1</b>  | 34.7      | 29.4      | <b>Co2</b>  | 32.5      | 27.3      |            |           |           |             |           |           | 2.2                  | 2.1                  |

<sup>a)</sup> Criteria for inclusion:  $R < 0.05$  and  $Z' \geq 2$ . Structures with significant disorder at the ligand were excluded. <sup>b)</sup> Contains multiple structures, each with two NHCs in the same environment. Due to symmetry, these are treated as multiple measures of the conformation (and steric impact) of the IPr ligand. <sup>c)</sup> Contains two structures, each with two Au atoms in different environments.
